# Supplementary material
Source: publisher site journal article supplement (https://www.spandidos-publications.com/6139/downloadSupplementary)

Video S1: Reconstruction of a 3D culture of A549 cells. A549 cells were seeded in serum-free RPMI medium onto Matrigel for 96 h. Following Periodic Acid Schiff staining to identify the glycoprotein-rich inner area of vasculogenic mimicry vessels, 3D reconstruction of 6-day-old 3D culture of A549 cells

was performed, with the resulting color map distinguishing between the planes and lumen-containing tubular structures present in the culture, using the confocal microscopy ZEN program.

Figure S1. Effect of doxazosin on cell cycle distribution in A549 cells. The A549 cells were incubated in the absence or presence of doxazosin. After the indicated treatment time, the cells were harvested for the detection of cell populations at different phases by propidium iodide staining and flow cytometry analysis.

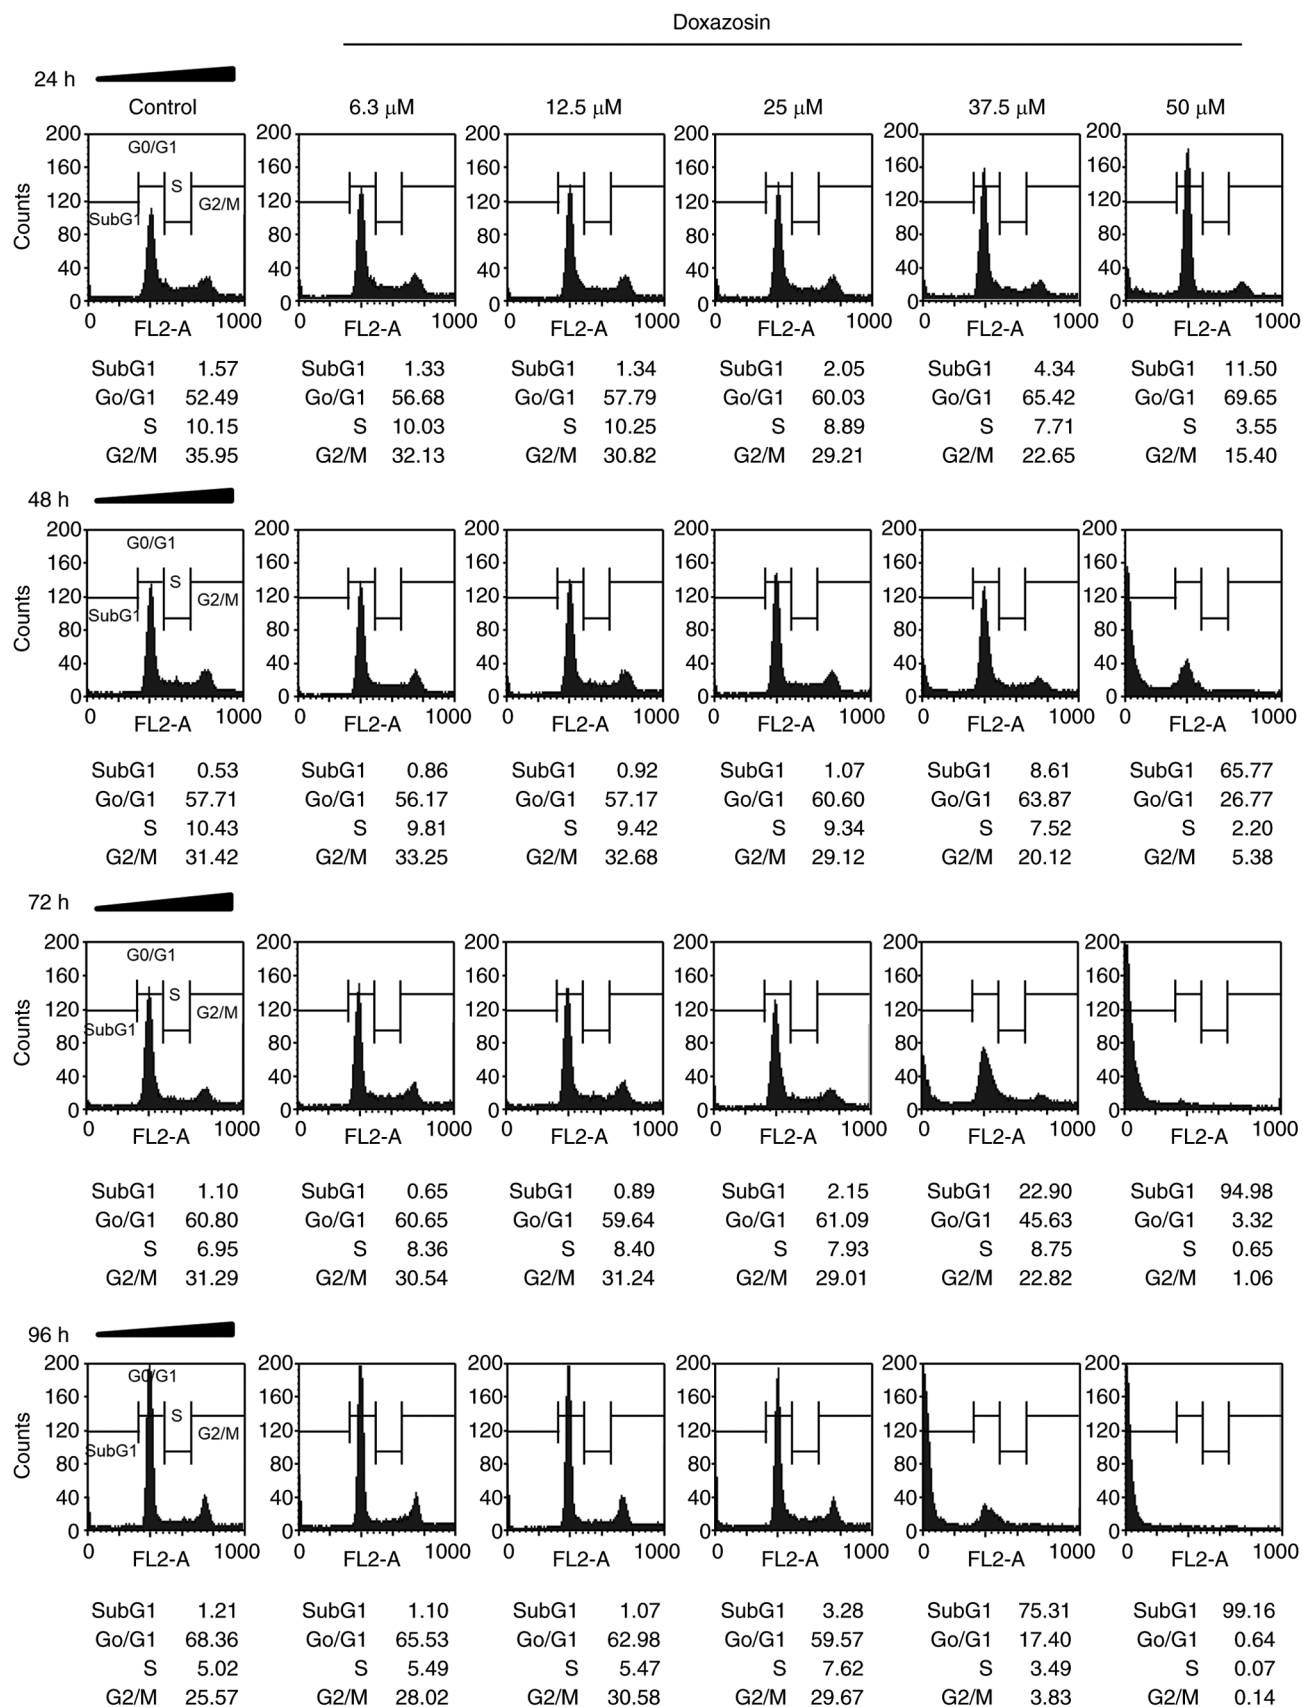

Figure S2. Expression of VE-cadherin. A549 cells were seeded in serum-free RPMI medium onto Matrigel for 4 (Basal), 24, 48, 72, 96 and 120 h. Then, Corning Cell Recovery Solution was used to recover cells from the 3D Matrigel cultures. The protein expression levels of VE-cadherin were determined by western blotting analysis. Data are presented as the mean  $\pm$  SEM of three to four experiments. \* $P$ <0.05, \*\* $P$ <0.01, compared with the basal control. VE-cadherin, vascular endothelial-cadherin.

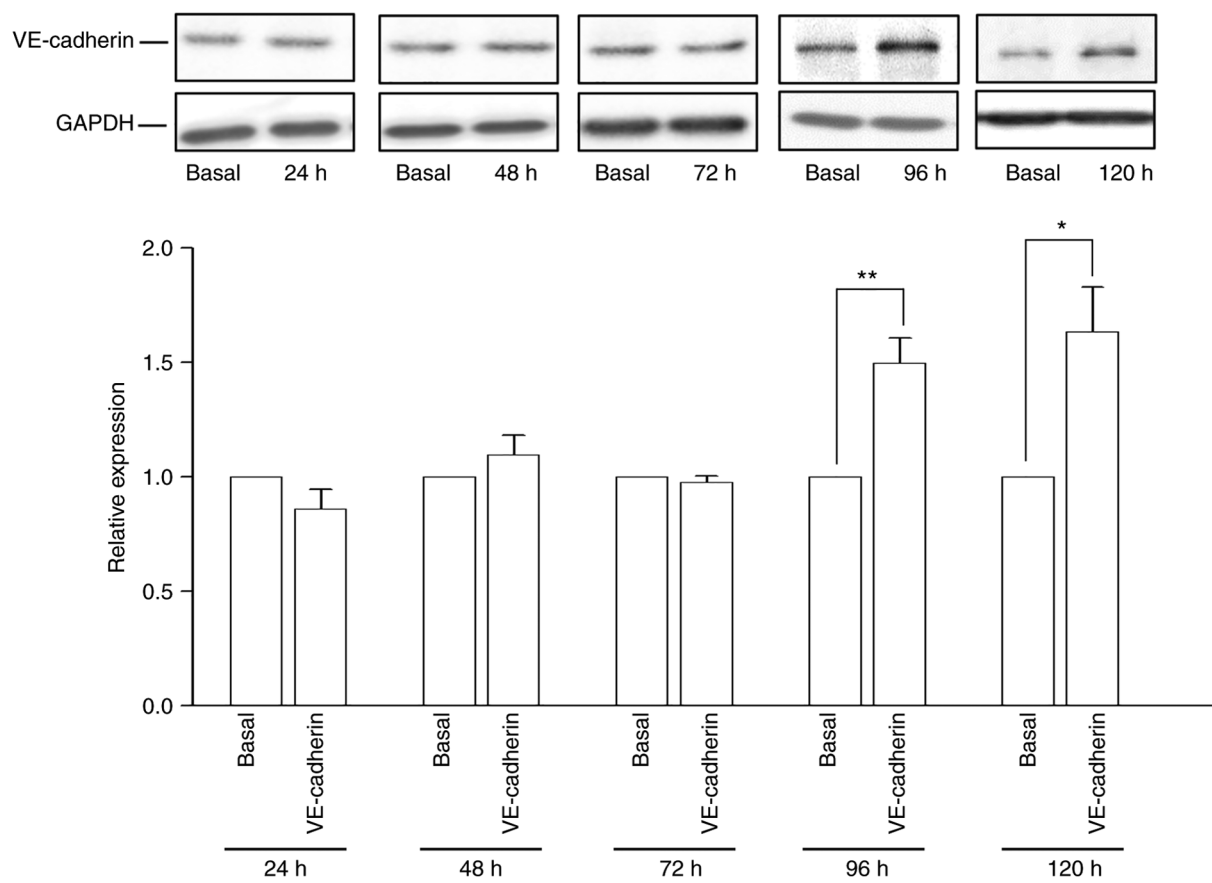

Supplement: Supplementary file 1 [file downloadSupplementary]
